# Supplementary material for: Performance of NEWS2, RETTS, clinical judgment and the Predict Sepsis screening tools with respect to identification of sepsis among ambulance patients with suspected infection: a prospective cohort study
Source: Springer Nature journal article supplement (doi:10.1186/s13049-021-00958-3), 2021-09-30
Supplement: MOESM1 [file 19716308]

**Additional file 1. Observed in-hospital mortality for patients identified as septic by the models.**

|                                                                                                                                                                                                                                                                                                                                                                                                                                                                                                                                                                                                                                                                                                                                                                                                                                                   | NEWS2 <sup>1</sup> ≥5 | NEWS2 ≥7         | RETTS <sup>2</sup> ≥orange | RETTS red      | Clinical judgment | Predict Sepsis tool 1 <sup>3</sup> | Predict Sepsis tool 2 <sup>3</sup> | Predict Sepsis tool 3 <sup>3</sup> |
|---------------------------------------------------------------------------------------------------------------------------------------------------------------------------------------------------------------------------------------------------------------------------------------------------------------------------------------------------------------------------------------------------------------------------------------------------------------------------------------------------------------------------------------------------------------------------------------------------------------------------------------------------------------------------------------------------------------------------------------------------------------------------------------------------------------------------------------------------|-----------------------|------------------|----------------------------|----------------|-------------------|------------------------------------|------------------------------------|------------------------------------|
| In-hospital mortality for patients identified as septic by the model (%)                                                                                                                                                                                                                                                                                                                                                                                                                                                                                                                                                                                                                                                                                                                                                                          | 17/176<br>(9.7)       | 15/123<br>(12.2) | 16/217<br>(7.4)            | 7/48<br>(14.6) | 6/105<br>(5.7)    | 18/234<br>(7.7)                    | 16/217<br>(7.4)                    | 17/240<br>(7.1)                    |
| <p>NEWS2=National Early Warning score 2, RETTS= Rapid Emergency Triage and Treatment System.</p> <p>References:</p> <p>1) Royal College of Physicians. National Early Warning Score (NEWS) 2- Standardising the assessment of acute-illness severity in the NHS, Updated report of a working party December 2017.</p> <p>2) Widgren BR, Jourak M. Medical Emergency Triage and Treatment System (METTS): a new protocol in primary triage and secondary priority decision in emergency medicine. The Journal of emergency medicine. 2011.</p> <p>3) Wallgren UM, Sjölin J, Järnbert-Pettersson H, Kurland L. The predictive value of variables measurable in the ambulance and the development of the Predict Sepsis screening tools: a prospective cohort study. Scandinavian journal of trauma, resuscitation and emergency medicine. 2020.</p> |                       |                  |                            |                |                   |                                    |                                    |                                    |
