# Supplementary material for: Performance of NEWS2, RETTS, clinical judgment and the Predict Sepsis screening tools with respect to identification of sepsis among ambulance patients with suspected infection: a prospective cohort study
Source: Springer Nature journal article supplement (doi:10.1186/s13049-021-00958-3), 2021-09-30
Supplement: MOESM3 [file 19716308]

**Additional file 3. McNemar's test, pairwise comparison of specificity for sepsis.**

| Compared with:                  | NEWS2 <sup>1</sup> ≥5 | NEWS2 ≥7 | RETTS <sup>2</sup> ≥orange | RETTS red | Clinical Judgment | Predict Sepsis tool 1 <sup>3</sup> ≥2 | Predict Sepsis tool 2 <sup>3</sup> ≥2 | Predict Sepsis tool 3 <sup>3</sup> ≥2 |
|---------------------------------|-----------------------|----------|----------------------------|-----------|-------------------|---------------------------------------|---------------------------------------|---------------------------------------|
| <b>NEWS2 ≥5</b>                 | X                     |          |                            |           |                   |                                       |                                       |                                       |
| <b>NEWS2 ≥7</b>                 | <0.001                | X        |                            |           |                   |                                       |                                       |                                       |
| <b>RETTS ≥orange</b>            | <0.001                | <0.001   | X                          |           |                   |                                       |                                       |                                       |
| <b>RETTS red</b>                | <0.001                | <0.001   | <0.001                     | X         |                   |                                       |                                       |                                       |
| <b>Clinical Judgment</b>        | 0.009                 | 0.350    | <0.001                     | <0.001    | X                 |                                       |                                       |                                       |
| <b>Predict Sepsis tool 1 ≥2</b> | <0.001                | <0.001   | 0.526                      | <0.001    | <0.001            | X                                     |                                       |                                       |
| <b>Predict Sepsis tool 2 ≥2</b> | 0.010                 | <0.001   | 0.526                      | <0.001    | <0.001            | <0.001                                | X                                     |                                       |
| <b>Predict Sepsis tool 3 ≥2</b> | <0.001                | <0.001   | 0.135                      | <0.001    | <0.001            | 0.533                                 | 0.027                                 | X                                     |

NEWS2=National Early Warning score 2, RETTS= Rapid Emergency Triage and Treatment System.

P-values derived from McNemar's test are presented in the table. Bold numbers of P-values indicate a significant difference between the models with respect to specificity for sepsis.

References:

- 1) Royal College of Physicians. National Early Warning Score (NEWS) 2- Standardising the assessment of acute-illness severity in the NHS, Updated report of a working party December 2017.
- 2) Widgren BR, Jourak M. Medical Emergency Triage and Treatment System (METTS): a new protocol in primary triage and secondary priority decision in emergency medicine. The Journal of emergency medicine. 2011.
- 3) Wallgren UM, Sjölin J, Järnbert-Pettersson H, Kurland L. The predictive value of variables measurable in the ambulance and the development of the Predict Sepsis screening tools: a prospective cohort study. Scandinavian journal of trauma, resuscitation and emergency medicine. 2020.
