# Supplementary material for: Performance of NEWS2, RETTS, clinical judgment and the Predict Sepsis screening tools with respect to identification of sepsis among ambulance patients with suspected infection: a prospective cohort study
Source: Springer Nature journal article supplement (doi:10.1186/s13049-021-00958-3), 2021-09-30
Supplement: MOESM4 [file 19716308]

**Additional file 4. DeLong’s test, pairwise comparison of AUC for sepsis for models without cut-offs.**

| Compared with:               | <b>NEWS2<sup>1</sup></b> | <b>Predict Sepsis tool 1<sup>2</sup></b> | <b>Predict Sepsis tool 2<sup>2</sup></b> | <b>Predict Sepsis tool 3<sup>2</sup></b> |
|------------------------------|--------------------------|------------------------------------------|------------------------------------------|------------------------------------------|
| <b>NEWS2</b>                 | X                        |                                          |                                          |                                          |
| <b>Predict Sepsis tool 1</b> | 0.188                    | X                                        |                                          |                                          |
| <b>Predict Sepsis tool 2</b> | 0.610                    | 0.214                                    | X                                        |                                          |
| <b>Predict Sepsis tool 3</b> | <b>0.010</b>             | 0.806                                    | 0.562                                    | X                                        |

NEWS2=National Early Warning score 2, RETTS= Rapid Emergency Triage and Treatment System.

P-values derived from DeLong’s test are presented in the table. Bold numbers of P-values indicate a significant difference between the AUC values (based on sum of scores) for the models with respect to outcome sepsis.

References:

- 1) Royal College of Physicians. National Early Warning Score (NEWS) 2- Standardising the assessment of acute-illness severity in the NHS, Updated report of a working party December 2017.
- 2) Wallgren UM, Sjölin J, Järnbert-Pettersson H, Kurland L. The predictive value of variables measurable in the ambulance and the development of the Predict Sepsis screening tools: a prospective cohort study. Scandinavian journal of trauma, resuscitation and emergency medicine. 2020.
