# Supplementary material for: Performance of NEWS2, RETTS, clinical judgment and the Predict Sepsis screening tools with respect to identification of sepsis among ambulance patients with suspected infection: a prospective cohort study
Source: Springer Nature journal article supplement (doi:10.1186/s13049-021-00958-3), 2021-09-30
Supplement: MOESM6 [file 19716308]

**Additional file 6. Performance of the screening models with respect to identification of septic shock.**

|                                                      | <b>NEWS2<sup>1</sup> ≥5</b> | <b>NEWS2 ≥7</b>     | <b>RETTS<sup>2</sup> ≥orange</b> | <b>RETTS red</b>    | <b>Clinical judgment</b>                        | <b>Predict Sepsis tool 1<sup>3</sup> ≥2</b> | <b>Predict Sepsis tool 2<sup>3</sup> ≥2</b> | <b>Predict Sepsis tool 3<sup>3</sup> ≥2</b> |
|------------------------------------------------------|-----------------------------|---------------------|----------------------------------|---------------------|-------------------------------------------------|---------------------------------------------|---------------------------------------------|---------------------------------------------|
| Total score considered positive for predicted sepsis | ≥5                          | ≥7                  | RETTS ≥ orange                   | RETTS red           | Clinical judgment sepsis by ambulance personnel | ≥2                                          | ≥2                                          | ≥2                                          |
| Sensitivity <sup>α</sup> (95%CI)                     | 0.94<br>(0.69-1.00)         | 0.82<br>(0.56-0.95) | 1.00<br>(0.77-1.00)              | 0.47<br>(0.24-0.71) | 0.76<br>(0.50-0.92)                             | 0.94<br>(0.69-1.00)                         | 0.94<br>(0.69-1.00)                         | 1.00<br>(0.77-1.00)                         |
| Specificity <sup>α</sup> (95%CI)                     | 0.28<br>(0.20-0.37)         | 0.44<br>(0.35-0.53) | 0.20<br>(0.13-0.28)              | 0.79<br>(0.71-0.86) | 0.63<br>(0.54-0.71)                             | 0.09<br>(0.05-0.16)                         | 0.13<br>(0.08-0.21)                         | 0.09<br>(0.05-0.16)                         |
| PPV <sup>α</sup> (95%CI)                             | 0.16<br>(0.09-0.24)         | 0.17<br>(0.10-0.27) | 0.15<br>(0.09-0.23)              | 0.24<br>(0.12-0.43) | 0.22<br>(0.13-0.36)                             | 0.13<br>(0.08-0.20)                         | 0.13<br>(0.08-0.21)                         | 0.13<br>(0.08-0.21)                         |
| NPV <sup>α</sup> (95%CI)                             | 0.97<br>(0.83-1.00)         | 0.95<br>(0.84-0.99) | 1.00<br>(0.83-1.00)              | 0.91<br>(0.84-0.96) | 0.95<br>(0.87-0.98)                             | 0.92<br>(0.60-1.00)                         | 0.94<br>(0.69-1.00)                         | 1.00<br>(0.68-1.00)                         |
| Pos LR <sup>α</sup> (95%CI)                          | 1.31<br>(1.11-1.54)         | 1.47<br>(1.12-1.92) | 1.25<br>(1.14-1.36)              | 2.28<br>(1.23-4.21) | 2.06<br>(1.45-2.92)                             | 1.04<br>(0.91-1.18)                         | 1.08<br>(0.95-1.24)                         | 1.10<br>(1.04-1.16)                         |
| Neg LR <sup>α</sup> (95%CI)                          | 0.21<br>(0.03-1.46)         | 0.40<br>(0.14-1.15) | 0<br>(0-NaN)                     | 0.67<br>(0.42-1.05) | 0.37<br>(0.16-0.89)                             | 0.65<br>(0.08-5.09)                         | 0.44<br>(0.06-3.31)                         | 0<br>(0-NaN)                                |

|                                                                        |                     |                     |                           |                           |                           |                     |                     |                     |
|------------------------------------------------------------------------|---------------------|---------------------|---------------------------|---------------------------|---------------------------|---------------------|---------------------|---------------------|
| AUC <sup>a</sup> for the model without cut-off -based on sum of scores | 0.69<br>(0.56-0.82) | 0.69<br>(0.56-0.82) | not possible to calculate | not possible to calculate | not possible to calculate | 0.71<br>(0.56-0.85) | 0.64<br>(0.50-0.78) | 0.65<br>(0.51-0.79) |
| AUC <sup>a</sup> for the model with specific cut-off                   | 0.61                | 0.63                | 0.60                      | 0.63                      | 0.70                      | 0.52                | 0.54                | 0.55                |

NEWS2=National Early Warning score 2, CI=Confidence Interval. NaN=calculation cannot be performed since the values entered include one or more instances of zero.

<sup>a</sup>with respect to outcome septic shock within 36 hours from emergency department arrival, among ambulance patients with clinically suspected infection.

For pairway comparisons of sensitivity, specificity, and AUC-values between the models, with respect to outcome septic shock, see Supplemental Appendix 7-12.

References:

- 1) Royal College of Physicians. National Early Warning Score (NEWS) 2- Standardising the assessment of acute-illness severity in the NHS, Updated report of a working party December 2017.
- 2) Widgren BR, Jourak M. Medical Emergency Triage and Treatment System (METTS): a new protocol in primary triage and secondary priority decision in emergency medicine. The Journal of emergency medicine. 2011.
- 3) Wallgren UM, Sjölin J, Jämbert-Pettersson H, Kurland L. The predictive value of variables measurable in the ambulance and the development of the Predict Sepsis screening tools: a prospective cohort study. Scandinavian journal of trauma, resuscitation and emergency medicine. 2020.
