# Supplementary material for: Performance of NEWS2, RETTS, clinical judgment and the Predict Sepsis screening tools with respect to identification of sepsis among ambulance patients with suspected infection: a prospective cohort study
Source: Springer Nature journal article supplement (doi:10.1186/s13049-021-00958-3), 2021-09-30
Supplement: MOESM9 [file 19716308]

**Additional file 9. DeLong’s test, pairwise comparison of AUC for septic shock for models without cut-offs.**

|                              | <b>NEWS2<sup>1</sup></b> | <b>Predict Sepsis tool 1<sup>2</sup></b> | <b>Predict Sepsis tool 2<sup>2</sup></b> | <b>Predict Sepsis tool 3<sup>2</sup></b> |
|------------------------------|--------------------------|------------------------------------------|------------------------------------------|------------------------------------------|
| <b>NEWS2</b>                 | X                        |                                          |                                          |                                          |
| <b>Predict Sepsis tool 1</b> | 0.805                    | X                                        |                                          |                                          |
| <b>Predict Sepsis tool 2</b> | 0.561                    | 0.170                                    | X                                        |                                          |
| <b>Predict Sepsis tool 3</b> | 0.130                    | 0.448                                    | 0.854                                    | X                                        |

NEWS2=National Early Warning score 2.

P-values derived from DeLong’s test are presented in the table.

References:

1) Royal College of Physicians. National Early Warning Score (NEWS) 2- Standardising the assessment of acute-illness severity in the NHS, Updated report of a working party December 2017.

2) Wallgren UM, Sjölin J, Järnbert-Pettersson H, Kurland L. The predictive value of variables measurable in the ambulance and the development of the Predict Sepsis screening tools: a prospective cohort study. Scandinavian journal of trauma, resuscitation and emergency medicine. 2020
