# Supplementary material for: Performance of NEWS2, RETTS, clinical judgment and the Predict Sepsis screening tools with respect to identification of sepsis among ambulance patients with suspected infection: a prospective cohort study
Source: Springer Nature journal article supplement (doi:10.1186/s13049-021-00958-3), 2021-09-30
Supplement: MOESM10 [file 19716308]

**Additional file 10. DeLong's test, pairwise comparison of AUC for septic shock for models with specific cut-offs.**

| Compared with:                  | <b>NEWS2<sup>1</sup> ≥5</b> | <b>NEWS2 ≥7</b> | <b>RETTS<sup>2</sup> ≥orange</b> | <b>RETTS red</b> | <b>Clinical Judgment</b> | <b>Predict Sepsis tool 1<sup>3</sup> ≥2</b> | <b>Predict Sepsis tool 2<sup>3</sup> ≥2</b> | <b>Predict Sepsis tool 3<sup>3</sup> ≥2</b> |
|---------------------------------|-----------------------------|-----------------|----------------------------------|------------------|--------------------------|---------------------------------------------|---------------------------------------------|---------------------------------------------|
| <b>NEWS2 ≥5</b>                 | X                           |                 |                                  |                  |                          |                                             |                                             |                                             |
| <b>NEWS2 ≥7</b>                 | 0.651                       | X               |                                  |                  |                          |                                             |                                             |                                             |
| <b>RETTS ≥orange</b>            | 0.738                       | 0.547           | X                                |                  |                          |                                             |                                             |                                             |
| <b>RETTS red</b>                | 0.753                       | 0.985           | 0.621                            | X                |                          |                                             |                                             |                                             |
| <b>Clinical Judgment</b>        | 0.222                       | 0.436           | 0.097                            | 0.398            | X                        |                                             |                                             |                                             |
| <b>Predict Sepsis tool 1 ≥2</b> | <b>0.049</b>                | 0.072           | <b>0.020</b>                     | 0.143            | <b>0.008</b>             | X                                           |                                             |                                             |
| <b>Predict Sepsis tool 2 ≥2</b> | 0.133                       | 0.146           | 0.088                            | 0.230            | <b>0.021</b>             | <b>0.023</b>                                | X                                           |                                             |
| <b>Predict Sepsis tool 3 ≥2</b> | 0.057                       | 0.103           | <b>0.001</b>                     | 0.188            | <b>0.010</b>             | 0.361                                       | 0.794                                       | X                                           |

NEWS2=National Early Warning score 2, RETTS= Rapid Emergency Triage and Treatment System.

P-values derived from DeLong's test are presented in the table. Bold numbers of P-values indicate a significant difference between the AUC values (for models with specific cut-offs) with respect to outcome septic shock.

References:

- 1) Royal College of Physicians. National Early Warning Score (NEWS) 2- Standardising the assessment of acute-illness severity in the NHS, Updated report of a working party December 2017.
- 2) Widgren BR, Jourak M. Medical Emergency Triage and Treatment System (METTS): a new protocol in primary triage and secondary priority decision in emergency medicine. The Journal of emergency medicine. 2011.
- 3) Wallgren UM, Sjölin J, Jämbert-Pettersson H, Kurland L. The predictive value of variables measurable in the ambulance and the development of the Predict Sepsis screening tools: a prospective cohort study. Scandinavian journal of trauma, resuscitation and emergency medicine. 2020.
