# Supplementary material for: Performance of NEWS2, RETTS, clinical judgment and the Predict Sepsis screening tools with respect to identification of sepsis among ambulance patients with suspected infection: a prospective cohort study
Source: Springer Nature journal article supplement (doi:10.1186/s13049-021-00958-3), 2021-09-30
Supplement: MOESM12 [file 19716308]

Additional file 12. ROC curves for models with specific cut-offs and septic shock.

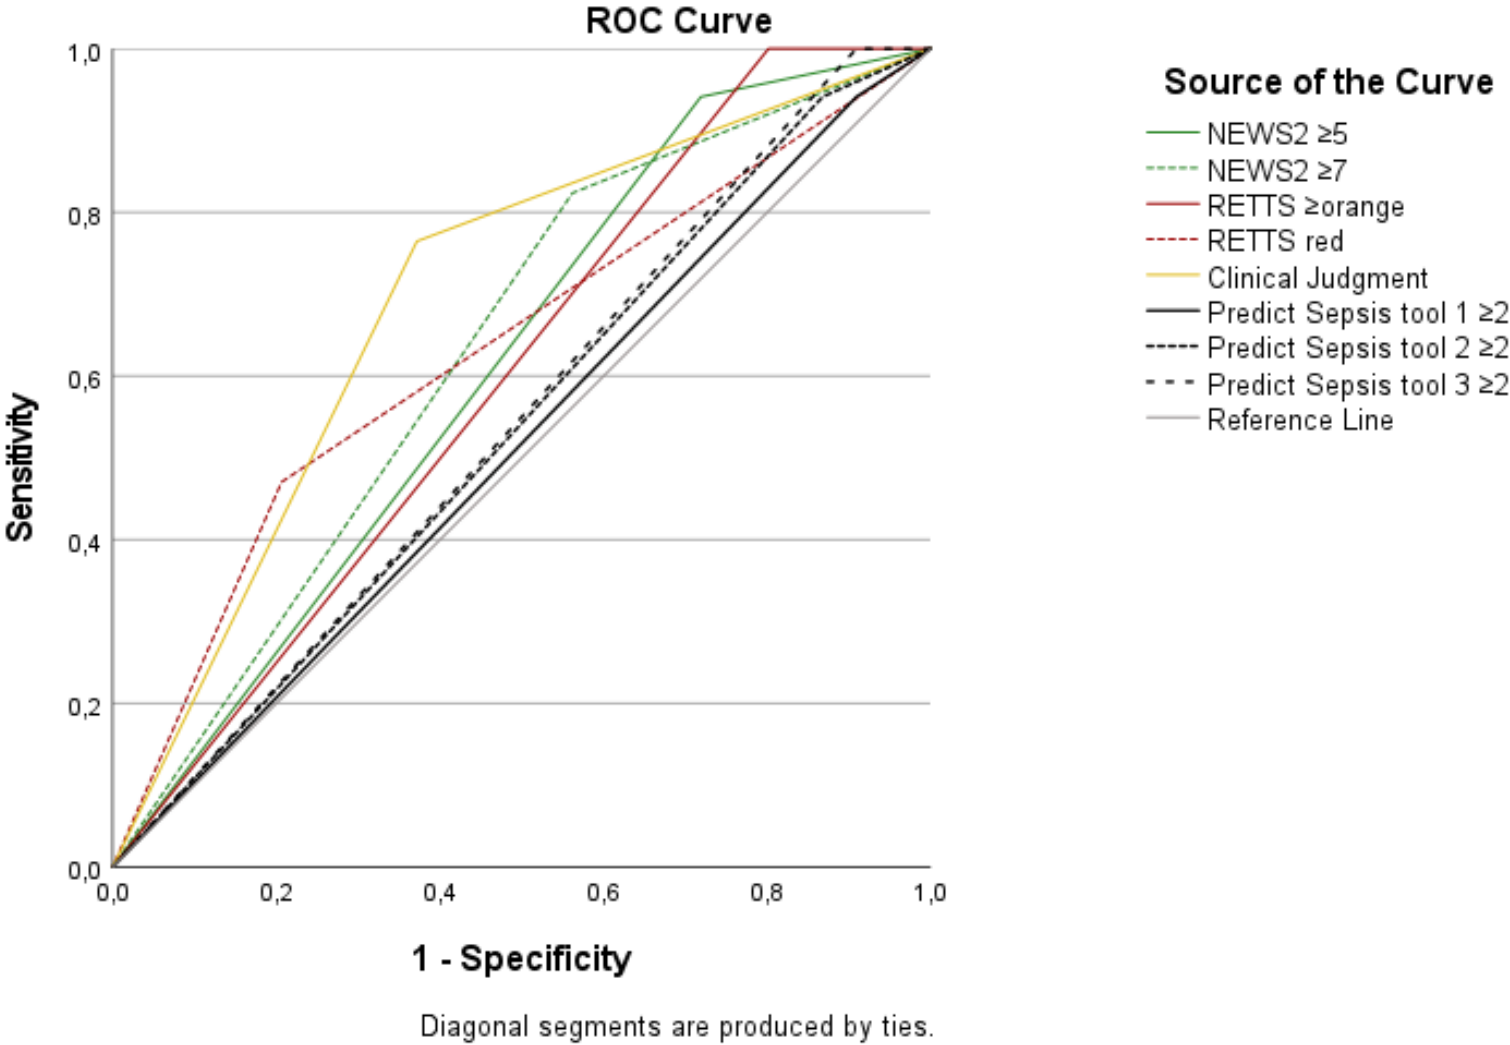

ROC=Receiver Operating Characteristic Curve, NEWS2=National Early Warning Score 2, RETTS= Rapid Emergency Triage and Treatment System
